# Supplementary material for: A Neoantigen-Based Peptide Vaccine for Patients With Advanced Pancreatic Cancer Refractory to Standard Treatment
Source: PubMed Central journal article supplement (PMC8414362; doi:10.3389/fimmu.2021.691605), 2021-08-13
Supplement: DataSheet_1.pdf [file DataSheet_1.pdf]

## Supplementary Materials

### Supplemental Information for Methods

#### Generation of neoantigen peptides

Tumor neoantigens were predicted and prioritized by in-house bioinformatics pipeline iNeo-SUITE, which consists modules of sequencing read filtering, genome alignment, mutation calling, HLA typing, MHC affinity prediction, gene expression profiling, vaccine peptide sequence design and prioritization based on therapeutic potency. FastQC (v0.11.4) was used for sequencing data quality control. Reads with quality score below 15 or more than 4 N bases were discarded [1]. The qualified reads were then mapped to the human reference HG38 (Human Genome version 38) by using Burrows-Wheeler Aligner software (BWA, v0.7.12). Next, comparing to normal sample, tumor somatic mutations were identified by integrating the mutation calling results from Mutect (v2.0), VarScan 2 (v.3.5.19) [2-5], Strelka (1.0.11) and somatic-sniper (v1.0.5.0). Then, somatic mutation candidates were ranked based on their reliability, and were manually inspected by Integrative Genomics Viewer (IGV v.1.0.6) according to their alignment profile. Meanwhile, germline mutations in both normal and tumor samples were identified by GATK HaplotypeCaller. The database of Single Nucleotide Polymorphism (dbSNP) (<https://www.ncbi.nlm.nih.gov/snp/>) and 1000 Genome datasets were used to filter out high population frequency (PF) mutations (PF > 1%) from somatic mutation candidates. Next, the mutations were further annotated by Variation Effect Predictor (VEP, ensemble v89) [5-7]. Using the reference sequences from IMGT datasets [6], HLA typing and quantification was done by OptiType (v1.3.1), Polysolver (V4), PHLAT (release 1.1) and in-house software iNeo-HLA. Subsequently, the flanking sequence of peptide or the upstream sequence of peptide were extracted from human protein database for single nucleotide mutations or frameshift and stop-loss mutations. To predict the neo-epitopes within those peptides, all possible segments that contain mutation-induced amino acid(s) were further extracted with length ranging from 8 to 16

amino acids (8-11 mer for HLA class I and 12-16 mer for HLA class II). The HLA class I neo-epitopes were predicted by in-house software iNeo-Pred, a deep-learning and machine-learning integrated predictor trained on datasets from IEDB and mass spectrometry (MS) profiling of HLA ligands. An epitope was considered to have binding affinity if the result from iNeo-Pred was below 500 nM. The HLA class II neo-epitopes were predicted by NetMHCIIpan (v4.0) according to the manual from official website [8].

After identifying all the neo-epitope candidates, in-house software iNeo-PRIOR was used to rank mutations based on their therapeutic potency, whereas mutation prevalence, gene expression, affinity change, epitope number, and heterologous level of mutant peptide, etc. were taken into consideration. Since all these factors contribute to the final therapeutic effect, a mathematical formula was designed to integrate all these factors into a single score for prioritization:

$$iNeo\_Score = f_1(Ag) \times f_2(E) \times f_3(M_i) \times f_4(H) + f_5(M_{ii})$$

In this formula, *iNeo\_Score* refers to the score for prioritization, Ag stands for mutation prevalence, E stands for the average gene expression obtained from TCGA database, and H stands for the heterologous level of mutant peptide.  $M_i$  and  $M_{ii}$  stand for the quality index which take affinity change and epitope number into account for epitopes presented by MHC I molecules and MHC II molecules respectively. Mutations with top ranking scores were subjected for choosing, while other factors such as the reliability of the mutation (assessed by manual examination and Sanger sequencing) and gene function (whether the mutation was in an oncogenic or cancer-driver gene) were also considered.

In-house software iNeo-DESIGN was applied to automatically designed vaccine peptide sequences (length ranging from 15 to 30 amino acids) containing neo-epitopes of both HLA class I and II. Safety issues such as potential peptide toxicity and bioactivity, as well as the difficulties in peptide synthesis were evaluated and optimized accordingly. Finally, the

customized long peptides were manufactured by chemical synthesis at GMP-like standard and clinical-grade (bacteria-free, >95.0% purity with less than 10 EU/mg bacterial endotoxin).

### **IFN- $\gamma$ enzyme-linked immunospot (ELISpot) assay**

Peripheral blood (10-30 mL) was collected from each patient, followed by the isolation of peripheral blood mononuclear cells (PBMCs) by Ficoll/Hypaque density-gradient centrifugation (GE Healthcare). IFN- $\gamma$  ELISpot assays were performed with Human IFN- $\gamma$  precoated ELISpot kit (DAKEWEI). Briefly, after adding 200 $\mu$ L serum-free medium into each well, the plate was incubated at room temperature for 5-10 minutes before discarding the solution. 100  $\mu$ L cell suspension was added to each well at a density of  $2 \times 10^5$  cells per well, followed by the addition of 5-10  $\mu$ g/mL neoantigen peptide into the same well as sample or 2  $\mu$ g/mL of CEF peptide as positive control. Then the mixtures were incubated at 37 °C for 16-24 hours. 200  $\mu$ L pre-cooled deionized water was added into each well to lyse at 4 °C for 10 minutes. The plates were washed 6 times before the addition of 100  $\mu$ L biotin-labeled antibody and then incubated at 37 °C for 1 hour. After washing the plates, 100  $\mu$ L enzyme-labeled avidin working solution was added into each well and incubated at 37 °C for 1 hour. AEC solution mix was then added into each well after washing the plates, and the plates were kept in the dark for 25 minutes at room temperature before adding deionized water to stop the reaction. ELISpot plate was then placed in an automatic plate reader set with appropriate parameters, spot count and statistical analysis. The samples with more than 100 spots after noise subtraction (based on negative control group) were considered to show strong positive results, while samples with 8 to 20 spots were considered to show weak positive results.

### **Cytometric analysis of T-lymphocyte activity through surface biomarker**

Antibodies were purchased from Biolegend, as shown in Table A. PBMCs were isolated, and T cells were labeled following manual instruction. In brief, the corresponding antibodies were added into an empty flow tube, mixed with 100  $\mu$ L T cell sample thoroughly, and then incubated

in the dark for 15 minutes. 2 mL of erythrocyte lysate (Zhejiang Bozhen Biotechnology Co., Ltd.) was added into the sample, mixed entirely, and then incubated in the dark for 10 minutes. The sample was centrifuged at 500×g for 5 minutes, and 1620 μL of supernatant (440 μL remained) was removed. Next, 10 μL of absolute count microspheres was added into the tube and mixed well. Cytometric analysis was conducted after sample preparation.

Table A: Antibodies for flow cytometry

| Fluorescence | Antibody       | Clone    |
|--------------|----------------|----------|
| FITC         | CD279 (PD-1)   | EH12.2H7 |
| PE           | CD197 (CCR7)   | G043H7   |
| PerCP/Cy5.5  | CD4            | OKT4     |
| PE/Cy7       | CD45RA         | HI100    |
| APC          | CD38           | HB-7     |
| A700         | CD8            | SK1      |
| APC/Cy7      | CD3            |          |
| BV421        | HLA-DR         |          |
| BV510        | CD45           |          |
| BV605        | CD152 (CTLA-4) | BNI3     |

### **Cytometric Bead Array (CBA) Analysis of Cytokines**

The concentrations of serum cytokines were measured by CBA, according to the manufacture's protocol (Hangzhou Saiji Biotechnology Co., Ltd). Th1/Th2 cytokine kit was applied. In brief, 25

$\mu\text{L}$  solution of captured microspheres was added into a blank flow tube, followed by the addition of 25  $\mu\text{L}$  buffer solution of microspheres. The mixture was incubated in the dark for 30 minutes. 25  $\mu\text{L}$  fluorescence detection reagent and 25  $\mu\text{L}$  serum were added successively. The solution was vortex-mixed and then incubated in the dark for 2.5 hours. After the addition of 1 mL of PBS solution, the sample was centrifuged at 200 $\times$ g for 5 minutes. Following the removal of supernatant, 100  $\mu\text{L}$  PBS solution was added to resuspend the sample. The samples were tested by a flow cytometer, and the acquired data were analyzed using FlowJo V10 software.

## References

1. Hundal, J., et al., *Cancer Immunogenomics: Computational Neoantigen Identification and Vaccine Design*. Cold Spring Harb Symp Quant Biol, 2016. **81**: p. 105-111.
2. Chen, F., et al., *Neoantigen identification strategies enable personalized immunotherapy in refractory solid tumors*. J Clin Invest, 2019. **130**.
3. Hundal, J., et al., *pVAC-Seq: A genome-guided in silico approach to identifying tumor neoantigens*. Genome Med, 2016. **8**(1): p. 11.
4. Ott, P.A., et al., *An immunogenic personal neoantigen vaccine for patients with melanoma*. Nature, 2017. **547**(7662): p. 217-221.
5. Ng, A.W.R., et al., *In silico-guided sequence modifications of K-ras epitopes improve immunological outcome against G12V and G13D mutant KRAS antigens*. PeerJ, 2018. **6**: p. e5056.
6. Hilf, N., et al., *Actively personalized vaccination trial for newly diagnosed glioblastoma*. Nature, 2019. **565**(7738): p. 240-245.
7. Keskin, D.B., et al., *Neoantigen vaccine generates intratumoral T cell responses in phase Ib glioblastoma trial*. Nature, 2019. **565**(7738): p. 234-239.
8. Andreatta, M., et al., *Accurate pan-specific prediction of peptide-MHC class II binding affinity with improved binding core identification*. Immunogenetics, 2015. **67**(11-12): p. 641-50.

## **Supplementary Tables**

Supplementary Table 1. The treatment process for patients before and after neoantigen vaccine therapy

Supplementary Table 2. QC metrics of whole-exome sequencing for each patient

Supplementary Table 3. Summary of the number of identified somatic mutations, predicted neoantigens and synthesized vaccine peptides

Supplementary Table 4. HLA allotypes in both normal and tumor cells for each patient

Supplementary Table 5. Summary of designed and synthesized peptides for each patient

Supplementary Table 6. The best response of each peptide/peptide pool for all 7 patients

Supplementary Table 7. Cytokine titers in peripheral blood for each patient

Supplementary Table 8. T-cell subsets before and after vaccination

Supplementary Table 9. Mutation of KRAS for each patient

Supplementary Table S1. The treatment process for patients before and after neoantigen vaccine therapy

| Patients | Diagnosed time | Treatment before enrollment                                                         |                                                                    |                                                                                           |                                                                                                        |                                                          | Neoantigen peptide vaccine treatment | Combination chemotherapy                | Late follow-up and assessment                                                                                                                                                                                                         |
|----------|----------------|-------------------------------------------------------------------------------------|--------------------------------------------------------------------|-------------------------------------------------------------------------------------------|--------------------------------------------------------------------------------------------------------|----------------------------------------------------------|--------------------------------------|-----------------------------------------|---------------------------------------------------------------------------------------------------------------------------------------------------------------------------------------------------------------------------------------|
|          |                | Conversion therapy                                                                  | Surgery                                                            | First-line chemotherapy                                                                   | Second-line chemotherapy                                                                               | Others                                                   |                                      |                                         |                                                                                                                                                                                                                                       |
| P01      | July,2017      | July 2017 to January 2018, AS 8 cycles                                              | March 2018. Laparoscopic radical resection of pancreatic cancer    | /                                                                                         | /                                                                                                      | /                                                        | June 2018 to November 2018           | July 2018 to November 2018, AS 5 cycles | For a period of time after the trial, the patient's disease was well controlled; pleural effusion occurred in September 2019, and the disease progressed rapidly. After supportive treatment and chemotherapy, she died in March 2020 |
| P02      | April,2016     | May 2016 to July 2016, AG 3 cycles                                                  | August 2016, pancreaticocystic combined splenectomy                | August 2016 to October 2017, AG 3 cycles+ GS 11 cycles.                                   | November 2017 to May 2018, FOLFIRINOX 10 cycles                                                        | /                                                        | June 2018 to August 2018             | /                                       | After progression, the patients left the group and were treated with chemotherapy locally. The specific situation is unknown. The patient died of progressive disease on December 31, 2018                                            |
| P03      | December,2017  | /                                                                                   | December 2017, Laparoscopic radical resection of pancreatic cancer | NA                                                                                        | /                                                                                                      | /                                                        | October 2018 to February 2019        | /                                       | Died in February 2019                                                                                                                                                                                                                 |
| P04      | October,2017   | October 2017 to February 2018, FOLFIRINOX 8 cycles                                  | Patient refused                                                    | February 2018 to April 2018, FOLFIRINOX 3 cycles                                          | October 2018 to November 2018, GEMOX 2 cycles, the patients could not tolerate the chemotherapy        | /                                                        | December,2018 to February 2019       | /                                       | The patient was treated locally and died in April 2020 due to tumor progression and biliary obstruction                                                                                                                               |
| P05      | August, 2017   | August 2017 to October 2017, AG 2 cycles; October 2017 to December 2017 GS 3 cycles | Patient refused                                                    | December 2017 to February 2018, GS 2 cycles                                               | February 2017 to May 2018, FOLFIRINOX 7 cycles                                                         | /                                                        | September 2018 to October 2018       | /                                       | Died in January 2019                                                                                                                                                                                                                  |
| P06      | November,2017  | /                                                                                   | December 2017, laparoscopic pancreaticoduodenectomy                | February 2018 to June 2018, AG 5 cycles, the patients could not tolerate the chemotherapy | /                                                                                                      | /                                                        | July 2018 to September 2018          | /                                       | Died in November 2018                                                                                                                                                                                                                 |
| P07      | December,2017  | /                                                                                   | January 2018. Laparoscopic radical resection of pancreatic cancer  | January 2018 to May 2018, AG 4 cycles                                                     | June 2018 to December 2018, FOLFIRINOX 13 cycles; From December 2018, the PD-1 inhibitor was combined. | March 2019 to June 2019, AS plus PD-1 inhibitor 5 cycles | August 2019 to October 2019          | September 2019, PD-1 inhibitor 1 cycle  | Gastric pyloric obstruction on October 2019. Died in January 2020.                                                                                                                                                                    |

FOLFIRINOX, 5-fluorouracil (5-FU), irinotecan, and oxaliplatin; AS, Albumin paclitaxel plus S-1; AG, Albumin paclitaxel plus gemcitabine; GEMOX, oxaliplatin plus gemcitabine; GS, gemcitabine plus S-1



Supplementary Table S2. QC metrics of whole-exome sequencing for each patient

|                               | P01       |           | P02      |           | P03      |           | P04      |           | P05      |           | P06       |           | P07       |           |
|-------------------------------|-----------|-----------|----------|-----------|----------|-----------|----------|-----------|----------|-----------|-----------|-----------|-----------|-----------|
|                               | Normal    | Tumor     | Normal   | Tumor     | Normal   | Tumor     | Normal   | Tumor     | Normal   | Tumor     | Normal    | Tumor     | Normal    | Tumor     |
| Q30%                          | 95.11%    | 86.56%    | 93.20%   | 92.27%    | 94.47%   | 89.78%    | 93.79%   | 90.24%    | 94.14%   | 86.37%    | 94.47%    | 88.21%    | 95.60%    | 95.52%    |
| [Total] Raw Reads (All reads) | 136986313 | 456410163 | 73972329 | 203516471 | 96941684 | 328345200 | 69039548 | 232823532 | 90938597 | 395302256 | 106480675 | 207874214 | 211301468 | 210937507 |
| [Target] Average depth        | 275.32    | 669.35    | 121.35   | 337.34    | 201.61   | 583.3     | 141.41   | 342.2     | 170.31   | 639.39    | 166.24    | 233.15    | 387.58    | 381.55    |
| [Target] Coverage (>=30x)     | 97.80%    | 99.59%    | 97.15%   | 99.59%    | 98.57%   | 99.75%    | 97.40%   | 99.05%    | 98.23%   | 99.75%    | 94.77%    | 91.94%    | 99.54%    | 99.30%    |
| [Target] No Coverage          | 0.21%     | 0.35%     | 0.06%    | 0.04%     | 0.17%    | 0.12%     | 0.08%    | 0.03%     | 0.05%    | 0.02%     | 1.90%     | 1.40%     | 0.18%     | 0.33%     |
| Contamination                 | 0.12%     | 8.20%     | 0.07%    | 0.10%     | 0.00%    | 0.46%     | 0.23%    | 2.29%     | 0.13%    | 2.23%     | 0.24%     | 3.80%     | 0.09%     | 0.08%     |
| Tumor Purity (%)              | 0.647     |           | 0.32%    |           | 0.353    |           | 0.374    |           | 0.28     |           | 0.72      |           | 0.38      |           |

**Supplementary Table S3. Summary of the number of identified somatic mutations, predicted neoantigens and synthesized vaccine peptides**

| Patient ID                              |                   | P01   | P02  | P03    | P04    | P05    | P06    | P07 |
|-----------------------------------------|-------------------|-------|------|--------|--------|--------|--------|-----|
| Total mutations                         | Total number      | 82340 | 169  | 3330   | 11815  | 8688   | 5394   | 114 |
|                                         | Missense_Mutation | 33663 | 104  | 2045   | 7404   | 5613   | 3335   | 96  |
|                                         | In_Frame_InDel    | 474   | 7    | 17     | 249    | 51     | 40     | 14  |
|                                         | Frame_Shift_InDel | 566   | 4    | 53     | 360    | 55     | 111    | 3   |
|                                         | Nonstop_Mutation  | 104   | 0    | 33     | 51     | 20     | 41     | 1   |
|                                         | Other             | 47533 | 54   | 1182   | 3751   | 2949   | 1867   | 0   |
| Mutations with more than one neoantigen | Total number      | 1808  | 111  | 2131   | 4957   | 5711   | 3493   | 104 |
|                                         | Missense_Mutation | 1751  | 103  | 2077   | 4615   | 5598   | 3316   | 96  |
|                                         | In_Frame_InDel    | 22    | 5    | 14     | 135    | 41     | 34     | 8   |
|                                         | Frame_Shift_InDel | 31    | 3    | 40     | 179    | 52     | 105    | 0   |
|                                         | Nonstop_Mutation  | 4     | 0    | 0      | 28     | 20     | 38     | 0   |
| Predicted epitopes                      | Class I           | 24800 | 1082 | 38792  | 66616  | 69884  | 54049  | 760 |
|                                         | Class II          | 71175 | 3957 | 152515 | 189842 | 233565 | 229590 | 766 |
| Number of peptides included in vaccine  |                   | 12    | 11   | 12     | 13     | 4      | 13     | 5   |



Supplementary Table 5. Summary of designed and synthesized peptides for each patient

| Patient ID | Immunizing pools | Peptide_ID | Gene_name | Chr   | POSITION  | Mutation_type        | Designed_peptide_for_synthesis      | Tumor Variant Freq.(exo me) | Number of Class I epitopes | Number of Class II epitopes | Water solubility |
|------------|------------------|------------|-----------|-------|-----------|----------------------|-------------------------------------|-----------------------------|----------------------------|-----------------------------|------------------|
| P01        | C                | 2          | C19orf54  | chr19 | 41255500  | SNV                  | LPLPPPPAATGPAPPHVFGLEKSQLLKEAF      | 0.203                       | 6                          | 43                          | Yes              |
| P01        | A                | 3          | NLRC5     | chr16 | 57060371  | SNV                  | HSLLTSFVCVCTGPGHKQGTGYAFTHLSLQEFLLK | 0.150                       | 8                          | 15                          | Yes              |
| P01        | C                | 5          | FHOD3     | chr18 | 34324091  | SNV                  | TVHKQSLHLHVCTMVIENFPDSSDLY          | 0.140                       | 13                         | 35                          | Yes              |
| P01        | B                | 6          | FANCM     | chr14 | 45623981  | SNV                  | EDFMKLYNHLCEMFAHTRSTSANGISAIQQG     | 0.125                       | 16                         | 58                          | Yes              |
| P01        | C                | 7          | GCNT1     | chr9  | 79117751  | SNV                  | DRLLRAIYMPQNFYCVHVDTKSE             | 0.120                       | 20                         | 27                          | Yes              |
| P01        | A                | 9          | ANKK1     | chr11 | 113270015 | SNV                  | KDGVAPLHFAAQGGDDRTARLLDHDGACVDAQ    | 0.100                       | 7                          | 20                          | Yes              |
| P01        | B                | 10         | CHTOP     | chr1  | 153609068 | SNV                  | MSAQAPKVVVLKSTTKM                   | 0.100                       | 3                          | 2                           | Yes              |
| P01        | B                | 12         | TP53      | chr17 | 7577558   | Frameshift deletion  | KKKKKCTTHYNYMCNSSAWAA               | 0.100                       | 15                         | 13                          | Yes              |
| P01        | -                | 13         | FBXO25    | chr8  | 363192    | SNV                  | CSQKLERENNHCNISHIILNSEDGEKK         | 0.097                       | 20                         | 22                          | No               |
| P01        | -                | 14         | ANK2      | chr4  | 114095671 | SNV                  | VVEYLKGGIDINTCNKGNLALHLAAKEGHV      | 0.090                       | 13                         | 27                          | No               |
| P01        | A                | 15         | ATXN2L    | chr16 | 28847378  | SNV                  | HPPOSHGGPPQGVAPSPGVPALSASTPSPYP     | 0.090                       | 5                          | 56                          | Yes              |
| P01        | B                | 16         | CC2D1A    | chr19 | 14020728  | SNV                  | KKKKKDGANDEELEAEFLAFVGGQPPALEKLGKGG | 0.090                       | 17                         | 57                          | Yes              |
| P01        | C                | 26         | LCMT2     | chr15 | 43621964  | Frameshift deletion  | GQFMLQHFRQLNSPCMAWSVFLTWRRSGAA      | 0.070                       | 47                         | 60                          | Yes              |
| P01        | A                | 28         | TNFRSF11A | chr18 | 60027241  | SNV                  | VEHHGTEKSDVVCSSSLPARKPPNGN          | 0.070                       | 6                          | 25                          | Yes              |
| P02        | -                | 2          | PSMD10    | chrX  | 107330945 | SNV                  | LKMIHILLYYKASTKIQDTEGNTPL           | 0.493                       | 13                         | 29                          | No               |
| P02        | B                | 3          | KRAS      | chr12 | 25380275  | SNV                  | KKKLDLDTAGHEEYSAMRDQYMRTGE          | 0.420                       | 2                          | 11                          | Yes              |
| P02        | C                | 4          | RNF220    | chr1  | 45110737  | SNV                  | GEAKEREAALWGAVLNGGPPSTRITP          | 0.320                       | 10                         | 34                          | Yes              |
| P02        | C                | 5          | TLL11     | chr9  | 124584976 | SNV                  | LVCGRGVSPGGRRPHCGPQPEPSPS           | 0.303                       | 7                          | 9                           | Yes              |
| P02        | B                | 6          | SMARCA4   | chr19 | 11095980  | SNV                  | HQMHPMESMHEKMGKDDPRYNQMKGMGMRS      | 0.290                       | 4                          | 7                           | Yes              |
| P02        | A                | 7          | RAP1GAP2  | chr17 | 2911425   | SNV                  | PEEDKFENGHHGGVVFESFKAIRVRSMSME      | 0.273                       | 10                         | 54                          | Yes              |
| P02        | -                | 8          | TNS1      | chr2  | 218712290 | SNV                  | KEATSDPSWTPSEEPNLLEKKKK             | 0.270                       | 7                          | 0                           | No               |
| P02        | C                | 9          | MYO9A     | chr15 | 72144565  | SNV                  | TDAESVNLDDYNIIVIASVFKQWLRDLPNKCK    | 0.268                       | 12                         | 48                          | Yes              |
| P02        | A                | 15         | LSG1      | chr3  | 194362826 | SNV                  | GRRNKKEKSCRLYKHLDM                  | 0.208                       | 7                          | 14                          | Yes              |
| P02        | B                | 16         | PIK3CA    | chr3  | 178936091 | SNV                  | QLKAISTRDLPSSEIKQEKDFLWSHRHYCVT     | 0.195                       | 7                          | 29                          | Yes              |
| P02        | A                | 17         | POLR3GL   | chr1  | 145460212 | SNV                  | ASQGGGRGRGRGQLTFNV                  | 0.193                       | 2                          | 8                           | Yes              |
| P02        | C                | 19         | PTPRCAP   | chr11 | 67203432  | SNV                  | GEGDQCCGEASSPEOVPRVKKK              | 0.188                       | 2                          | 10                          | Yes              |
| P02        | -                | 20         | SNX6      | chr14 | 35044969  | SNV                  | LKLSDLLKYYLRESQVAKDLLYRRSRSLVDY     | 0.175                       | 17                         | 58                          | No               |
| P02        | A                | 21         | ARSI      | chr5  | 149677313 | SNV                  | ISEGRASRTEILHNFDPYLNHAHQHSLGEG      | 0.175                       | 16                         | 36                          | Yes              |
| P03        | -                | 1          | MIF       | chr22 | 23894500  | SNV                  | MPMFIVNTSVPRASVPDGLFS               | 0.388                       | 16                         | 19                          | No               |
| P03        | C                | 2          | HADHB     | chr2  | 26289946  | SNV                  | KKCAAGGGHAMIVEAYLK                  | 0.303                       | 8                          | 8                           | Yes              |
| P03        | A                | 3          | PQB1      | chrX  | 48902476  | Frameshift deletion  | GKERRHPGGAGLSLQEQEGSKPK             | 0.295                       | 14                         | 30                          | Yes              |
| P03        | -                | 4          | TP53      | chr17 | 7675143   | SNV                  | VDSTPPPGTRIRAMAIYKQSQHMTEV          | 0.213                       | 15                         | 34                          | No               |
| P03        | A                | 7          | PSMD3     | chr17 | 39996222  | SNV                  | AKAIRDGVIEASINLKKGYVQSKEMID         | 0.158                       | 12                         | 42                          | Yes              |
| P03        | B                | 9          | DNM2      | chr19 | 10833261  | SNV                  | YRAAGGEGSLPPPKEQRPKK                | 0.130                       | 7                          | 5                           | Yes              |
| P03        | B                | 10         | SPAG16    | chr2  | 213375036 | Frameshift insertion | HSREKENDHQVLLRKVFVKPGNKTNVKQR       | 0.110                       | 16                         | 31                          | Yes              |
| P03        | C                | 11         | MED13L    | chr12 | 116006330 | SNV                  | TPVPDGNKAMLSFSAKTDVRODN             | 0.100                       | 19                         | 38                          | Yes              |
| P03        | -                | 13         | ANO6      | chr12 | 45439718  | SNV                  | EYLALLPRLGHGSMISAHNCLRRLPVD         | 0.083                       | 21                         | 44                          | No               |
| P03        | C                | 14         | FCER1G    | chr1  | 161220408 | Frameshift insertion | EKSDGVYTMESPSITQAGVQWHDGLSLQKK      | 0.070                       | 22                         | 46                          | Yes              |
| P03        | A                | 16         | GPSM1     | chr9  | 136341025 | Frameshift deletion  | AQGEFQCGGVLHHRHGHQELRRGG            | 0.070                       | 13                         | 29                          | Yes              |
| P03        | B                | 17         | GPSM1     | chr9  | 136341025 | Frameshift deletion  | RHGPHQLRRGGIEARPAWRRWQPPENG         | 0.070                       | 22                         | 38                          | Yes              |
| P03        | C                | 18         | GPSM1     | chr9  | 136341025 | Frameshift deletion  | ARPAWRRWQPPENGAYKPVLLGLRDSTGL       | 0.070                       | 38                         | 24                          | Yes              |
| P03        | A                | 19         | SNX21     | chr20 | 45838289  | SNV                  | KDPPSKYVROGLAMLARLVNSNSWP           | 0.070                       | 12                         | 36                          | Yes              |
| P03        | A                | 20         | SGSM3     | chr22 | 40404316  | SNV                  | PLMEDAPQLRQWQAHLEFTHNHVDG           | 0.070                       | 15                         | 32                          | Yes              |
| P04        | C                | 1          | MEN1      | chr11 | 64572018  | SNV                  | PEGGTAQVPAAPASVPPPEPVLK             | 0.335                       | 8                          | 3                           | Yes              |
| P04        | B                | 2          | MYH14     | chr19 | 50726572  | SNV                  | TENTKKVIQYLAHVALLSPKGRKEPGV         | 0.180                       | 13                         | 34                          | Yes              |
| P04        | -                | 3          | TP53      | chr17 | 7578479   | SNV                  | PVQLWVDSVSPPTRVRAMAIYKQS            | 0.165                       | 12                         | 6                           | No               |
| P04        | A                | 4          | ANKRD11   | chr16 | 89351239  | SNV                  | KKAWSEVSSLSDSTRARLTSESDY            | 0.145                       | 8                          | 6                           | Yes              |
| P04        | A                | 5          | RPL23     | chr17 | 37004296  | SNV                  | LRKKVLLCHPGWSAVTPLKLTVTLNKK         | 0.143                       | 14                         | 24                          | Yes              |
| P04        | B                | 6          | KRAS      | chr12 | 25398284  | SNV                  | TEYKLVVVGADGVGKSALTIQLIQNH          | 0.130                       | 7                          | 6                           | Yes              |
| P04        | A                | 8          | RBM25     | chr14 | 73572607  | Frameshift deletion  | RERERTRARTRIGARERAR                 | 0.100                       | 7                          | 0                           | Yes              |
| P04        | B                | 9          | RBM25     | chr14 | 73572607  | Frameshift deletion  | RAREGTGARKRKRQKTGPRRR               | 0.100                       | 6                          | 0                           | Yes              |
| P04        | -                | 10         | ZEB1      | chr10 | 31810505  | SNV                  | SLPKQOQELLQRSTITSVYQNSVYSV          | 0.087                       | 12                         | 26                          | No               |
| P04        | A                | 11         | C15orf40  | chr15 | 83657573  | Frameshift deletion  | KSDVVLDKGLTFSPRLEHSGTTSGH           | 0.070                       | 11                         | 15                          | Yes              |
| P04        | B                | 12         | C15orf40  | chr15 | 83657573  | Frameshift deletion  | HSGTTSGHCLDFPGSNNPPTSASQV           | 0.070                       | 12                         | 0                           | Yes              |
| P04        | A                | 13         | C15orf40  | chr15 | 83657573  | Frameshift deletion  | ASQVAGTTGACHPHANFRIF                | 0.070                       | 16                         | 0                           | Yes              |
| P04        | B                | 15         | PCTP      | chr17 | 53864996  | SNV                  | SNPLASASQSAGITGVSHHTRPIRAEPS        | 0.060                       | 15                         | 7                           | Yes              |
| P04        | C                | 17         | PPP1CB    | chr2  | 29004735  | Frameshift deletion  | FCCHGGRLVNLVYRFFLLFLFKYKKKK         | 0.060                       | 26                         | 34                          | Yes              |
| P04        | -                | 18         | SMG5      | chr1  | 156247808 | Frameshift deletion  | LRNKLRELKLVLMFCTQWTMGERLRS          | 0.050                       | 17                         | 21                          | No               |
| P04        | C                | 20B        | SMG5      | chr1  | 156247808 | Frameshift deletion  | SLSRLTKSTAGALWNVPTGRTWL             | 0.050                       | 23                         | 11                          | Yes              |
| P05        | -                | 31         | RBM10     | chrX  | 47041437  | Frameshift deletion  | RLPRTWNAQPAVSTNKKKTSKIASLSAPC       | 0.200                       | 18                         | 56                          | No               |
| P05        | -                | 7          | MYH9      | chr22 | 36716404  | SNV                  | FYLLSGAGEHLKTELLPEYNYKRYFLSNG       | 0.173                       | 12                         | 48                          | No               |
| P05        | A                | 8          | DISC1     | chr1  | 231902938 | SNV                  | GDDTHFPLRMEPRLLQPTAQDSLHVSITRRD     | 0.160                       | 9                          | 27                          | Yes              |
| P05        | -                | 9          | PSTK      | chr10 | 124740063 | SNV                  | RKRGGLCVPGCPAAGKSTFARAL             | 0.147                       | 9                          | 18                          | No               |
| P05        | B                | 16         | MFS12     | chr19 | 3567148   | SNV                  | LGSSDSPASASRAVGITFPVAGGGCR          | 0.130                       | 5                          | 37                          | Yes              |
| P05        | B                | 17         | EDEM2     | chr20 | 33703379  | SNV                  | SGWPEPARPRTLFSFENHDQ                | 0.127                       | 7                          | 0                           | Yes              |
| P05        | A                | 23         | CPS1      | chr2  | 211441079 | SNV                  | KKGEVVTNGLGGYDPAITDPAYK             | 0.113                       | 4                          | 20                          | Yes              |
| P06        | -                | 1          | KRAS      | chr12 | 25398284  | SNV                  | TEYKLVVVGAVGVGKSALTIQLIQNHK         | 0.197                       | 9                          | 43                          | No               |
| P06        | A                | 2          | NLRC5     | chr16 | 57095846  | SNV                  | SPTLEACALGFKKKKKKRRKVVSE            | 0.180                       | 8                          | 33                          | Yes              |
| P06        | -                | 3          | PDZRN3    | chr3  | 73450100  | SNV                  | KKKKKYIGDIHQDMDFREELEEEVDLYR        | 0.143                       | 10                         | 5                           | No               |
| P06        | -                | 4          | GALNS     | chr16 | 88891240  | SNV                  | DRPIFYRGDTLMASLTGQHKAHFWTWTNS       | 0.140                       | 11                         | 53                          | No               |
| P06        | -                | 5          | LILRB1    | chr19 | 55146175  | SNV                  | KKKLLLLLLLLLHRRRQGGKHWTSQR          | 0.140                       | 19                         | 44                          | No               |
| P06        | C                | 6          | LILRB1    | chr19 | 55146175  | SNV                  | LLFLLLRHRRGKHWTSQR                  | 0.140                       | 4                          | 20                          | Yes              |
| P06        | B                | 7          | SRSF6     | chr20 | 42089202  | SNV                  | RSRRRSRSRSRSRSRSRSRSRSRSRSR         | 0.140                       | 8                          | 17                          | Yes              |
| P06        | B                | 9          | NCAPH2    | chr22 | 50956050  | SNV                  | KKKKQLSSVQEDRANVASSGVQEAENEF        | 0.137                       | 6                          | 37                          | Yes              |
| P06        | A                | 10         | STAG1     | chr3  | 136068029 | SNV                  | YRNKKGGOPPLHKKR                     | 0.137                       | 7                          | 0                           | Yes              |

**Supplementary Table 6. The best response of each peptide/peptide pool for all 7 patients**

| Patient ID | Experimental control / Number of peptide | Immunizing pools | IFN- $\gamma$ spots | IFN- $\gamma$ spots per 10 <sup>5</sup> PBMCs | Response        |
|------------|------------------------------------------|------------------|---------------------|-----------------------------------------------|-----------------|
| P01        | Positive control                         | /                | 1200                | 480                                           | /               |
|            | Negative control                         | /                | 16                  | 6                                             | /               |
|            | 2                                        | C                | 484                 | 194                                           | Strong Positive |
|            | 3                                        | A                | 598                 | 239                                           | Strong Positive |
|            | 5                                        | C                | 441                 | 176                                           | Strong Positive |
|            | 6                                        | B                | 702                 | 281                                           | Strong Positive |
|            | 7                                        | C                | 543                 | 217                                           | Strong Positive |
|            | 9                                        | A                | 588                 | 235                                           | Strong Positive |
|            | 10                                       | B                | 347                 | 139                                           | Strong Positive |
|            | 12                                       | B                | 406                 | 162                                           | Strong Positive |
|            | 15                                       | A                | 337                 | 135                                           | Strong Positive |
|            | 16                                       | B                | 245                 | 98                                            | Strong Positive |
|            | 26                                       | C                | 176                 | 59                                            | Strong Positive |
|            | 28                                       | A                | 113                 | 38                                            | Strong Positive |
| P02        | Positive control                         | /                | 626                 | 250                                           | /               |
|            | Negative control                         | /                | 16                  | 6                                             | /               |
|            | 3                                        | B                | 172                 | 69                                            | medium Positive |
|            | 4                                        | C                | 150                 | 60                                            | medium Positive |
|            | 5                                        | C                | 180                 | 72                                            | medium Positive |
|            | 6                                        | B                | 164                 | 66                                            | medium Positive |
|            | 7                                        | A                | 156                 | 62                                            | medium Positive |
|            | 9                                        | C                | 145                 | 58                                            | medium Positive |
|            | 15                                       | A                | 150                 | 60                                            | medium Positive |
|            | 16                                       | B                | 164                 | 66                                            | medium Positive |

|     |                  |   |      |     |                 |
|-----|------------------|---|------|-----|-----------------|
|     | 17               | A | 60   | 30  | weak Positive   |
|     | 19               | C | 67   | 34  | weak Positive   |
|     | 21               | A | 40   | 20  | weak Positive   |
| P03 | Positive control | / | 1240 | 620 | /               |
|     | Negative control | / | 1    | 1   | /               |
|     | 2                | C | 2    | 1   | negative        |
|     | 3                | A | 3    | 2   | negative        |
|     | 7                | A | 4    | 2   | negative        |
|     | 9                | B | 4    | 2   | negative        |
|     | 10               | B | 5    | 3   | negative        |
|     | 11               | C | 3    | 2   | negative        |
|     | 14               | C | 2    | 1   | negative        |
|     | 16               | A | 1    | 1   | negative        |
|     | 17               | B | 108  | 54  | medium Positive |
|     | 18               | C | 111  | 56  | medium Positive |
|     | 19               | A | 101  | 51  | medium Positive |
|     | 20               | A | 99   | 50  | medium Positive |
| P04 | Positive control | / | 334  | 167 | /               |
|     | Negative control | / | 6    | 3   | /               |
|     | 1                | C | 18   | 6   | negative        |
|     | 2                | B | 31   | 10  | weak Positive   |
|     | 4                | A | 22   | 7   | negative        |
|     | 5                | A | 37   | 12  | weak Positive   |
|     | 6                | B | 28   | 9   | negative        |
|     | 8                | A | 23   | 8   | negative        |
|     | 9                | B | 26   | 9   | negative        |
|     | 11               | A | 10   | 3   | negative        |
|     | 12               | B | 12   | 4   | negative        |
|     | 13               | A | 38   | 13  | weak Positive   |

|     |                  |   |     |          |          |
|-----|------------------|---|-----|----------|----------|
|     | 15               | B | 23  | 8        | negative |
|     | 17               | C | 20  | 7        | negative |
|     | 20B              | C | 23  | 8        | negative |
| P05 | Positive control | / | 196 | 98       | /        |
|     | Negative control | / | 48  | 24       | /        |
|     | 8                | A | 82  | 41       | negative |
|     | 16               | B | 91  | 46       | negative |
|     | 17               | B | 137 | 69       | negative |
|     | 23               | A | 158 | 79       | negative |
| P06 | Positive control | / | 675 | 338      | /        |
|     | Negative control | / | 1   | 1        | /        |
|     | 2                | A | 7   | 3        | negative |
|     | 6                | C | 5   | 2        | negative |
|     | 7                | B | 4   | 2        | negative |
|     | 9                | B | 1   | 0        | negative |
|     | 10               | A | 0   | 0        | negative |
|     | 12               | A | 0   | 0        | negative |
|     | 13               | A | 0   | 0        | negative |
|     | 15               | B | 0   | 0        | negative |
|     | 16               | B | 2   | 1        | negative |
|     | 17               | C | 6   | 2        | negative |
|     | 18               | C | 5   | 2        | negative |
|     | 19               | A | 12  | 5        | negative |
| 20  | C                | 6 | 2   | negative |          |
| P07 | Positive control | / | 976 | 488      | /        |
|     | Negative control | / | 1   | 1        | /        |
|     | 22B              | A | 0   | 0        | negative |
|     | 23               | A | 0   | 0        | negative |
|     | 25               | B | 0   | 0        | negative |
|     | 27               | B | 0   | 0        | negative |
|     | 32               | A | 0   | 0        | negative |

**Supplementary Table 7. Cytokine titers in peripheral blood for each patient**

| Fold change of cytokines in peripheral blood post vaccination |       |      |      |     |      |      |       |      |        |
|---------------------------------------------------------------|-------|------|------|-----|------|------|-------|------|--------|
| Cytokines                                                     | Unit  | P01  | P02  | P04 | P07  | P03  | P05   | P06  | t-test |
| TNF- $\alpha$                                                 | pg/ml | 1.38 | 0.67 | N/A | 1.05 | 0.00 | 0.92  | 0.93 | 0.327  |
| IL-1 $\beta$                                                  | pg/ml | 1.00 | 1.00 | N/A | 1.00 | 1.00 | 1.00  | 1.00 | N/A    |
| IL-6                                                          | pg/ml | 1.38 | 1.32 | N/A | 0.75 | 1.10 | 14.66 | 1.55 | 0.359  |
| IL-8                                                          | pg/ml | 0.35 | 0.72 | N/A | N/A  | 1.50 | 0.18  | 1.53 | 0.431  |
| IL-10                                                         | pg/ml | 1.00 | 1.00 | N/A | 2.47 | 1.00 | 1.00  | 1.00 | 0.374  |
| IL-2                                                          | pg/ml | 1.00 | 1.00 | N/A | 1.05 | 1.00 | 1.00  | 1.00 | 0.374  |
| IFN- $\gamma$                                                 | pg/ml | 4.53 | 9.20 | N/A | 4.64 | 1.36 | 1.00  | 0.81 | 0.031  |



**Supplementary Table 8. T-cell subsets before and after vaccination**

**Fold Change post-vac**

| Marker             | Unit                                                           | P01  | P02  | P04  | P07  | P03  | P05  | P06  | t-test |
|--------------------|----------------------------------------------------------------|------|------|------|------|------|------|------|--------|
| CD4+ CD45RA+ CCR7+ | Naïve CD4+T Cell (9.56-29.87%) (154.2-239.7 per ul)            | 1.06 | 1.25 | 1.21 | 0.92 | 0.92 | 1.20 | 0.45 | 0.259  |
| CD4+ CD45RA- CCR7+ | Central Memory CD4+T Cell (7.19-26.33%) (106.2-196.9 per ul)   | 0.81 | 0.84 | 0.93 | 1.13 | 1.11 | 0.92 | 0.10 | 0.461  |
| CD4+ CD45RA+ CCR7- | Effector CD4+T Cell (0.44-6.06%) (6.432-23.10 per ul)          | 2.32 | 1.03 | 1.95 | 0.66 | 0.78 | 0.95 | 0.08 | 0.142  |
| CD4+ CD45RA- CCR7- | Effector Memory CD4+T Cell (17.27-39.12%) (149.4-242.1 per ul) | 2.36 | 1.96 | 1.52 | 0.63 | 0.70 | 0.85 | 0.22 | 0.081  |
| CD4+ CD38+ HLA-DR+ | Activated CD4+T Cell (0.58-2.43%) (8.757-14.33 per ul)         | 0.77 | 0.79 | 1.70 | 0.73 | 1.34 | 0.56 | 0.25 | 0.507  |
| CD8+ CD45RA+ CCR7+ | Naïve CD8+T Cell (1.23-8.84%) (22.80-74.10 per ul)             | 1.16 | 0.91 | 0.77 | 0.42 | 0.59 | 1.95 | 0.57 | 0.628  |
| CD8+ CD45RA- CCR7+ | Central Memory CD8+T Cell (0.37-1.63%) (7.909-12.64 per ul)    | 2.26 | 0.46 | 0.44 | 1.50 | 3.68 | 5.32 | 0.24 | 0.217  |
| CD8+ CD45RA+ CCR7- | Effector CD8+T Cell (3.26-10.42%) (28.02-52.05 per ul)         | 0.80 | 1.47 | 1.66 | 0.64 | 0.57 | 1.37 | 0.63 | 0.469  |
| CD8+ CD45RA- CCR7- | Effector Memory CD8+T Cell (8.08-27.96%) (50.34-98.14 per ul)  | 1.24 | 1.88 | 1.31 | 0.64 | 0.54 | 0.72 | 1.01 | 0.174  |
| CD8+ CD38+ HLA-DR+ | Activated CD8+T Cell (0.27-5.70%) (8.462-16.54 per ul)         | 0.72 | 1.25 | 2.59 | 1.16 | 0.69 | 1.92 | 1.79 | 0.951  |

**Baseline**

| Marker             | Unit                                                           | P01    | P02    | P04    | P07    | P03    | P05   | P06   | t-test |
|--------------------|----------------------------------------------------------------|--------|--------|--------|--------|--------|-------|-------|--------|
| CD4+ CD45RA+ CCR7+ | Naïve CD4+T Cell (9.56-29.87%) (154.2-239.7 per ul)            | 87.80  | 90.23  | 286.09 | 42.32  | 233.06 | 20.06 | 22.20 | 0.706  |
| CD4+ CD45RA- CCR7+ | Central Memory CD4+T Cell (7.19-26.33%) (106.2-196.9 per ul)   | 268.94 | 165.37 | 106.73 | 260.51 | 91.58  | 53.58 | 46.08 | 0.035  |
| CD4+ CD45RA+ CCR7- | Effector CD4+T Cell (0.44-6.06%) (6.432-23.10 per ul)          | 6.62   | 129.65 | 7.26   | 39.53  | 8.07   | 4.81  | 2.56  | 0.290  |
| CD4+ CD45RA- CCR7- | Effector Memory CD4+T Cell (17.27-39.12%) (149.4-242.1 per ul) | 193.53 | 191.70 | 133.97 | 266.09 | 165.69 | 82.06 | 68.58 | 0.077  |
| CD4+ CD38+ HLA-DR+ | Activated CD4+T Cell (0.58-2.43%) (8.757-14.33 per ul)         | 28.62  | 49.35  | 8.43   | 80.08  | 4.84   | 6.40  | 16.34 | 0.137  |
| CD8+ CD45RA+ CCR7+ | Naïve CD8+T Cell (1.23-8.84%) (22.80-74.10 per ul)             | 14.31  | 11.25  | 77.16  | 9.63   | 21.43  | 14.44 | 8.98  | 0.533  |
| CD8+ CD45RA- CCR7+ | Central Memory CD8+T Cell (0.37-1.63%) (7.909-12.64 per ul)    | 2.14   | 8.34   | 5.58   | 5.83   | 1.17   | 0.99  | 1.75  | 0.041  |
| CD8+ CD45RA+ CCR7- | Effector CD8+T Cell (3.26-10.42%) (28.02-52.05 per ul)         | 291.15 | 65.22  | 70.16  | 412.31 | 197.25 | 69.05 | 39.78 | 0.369  |
| CD8+ CD45RA- CCR7- | Effector Memory CD8+T Cell (8.08-27.96%) (50.34-98.14 per ul)  | 201.86 | 68.93  | 106.99 | 350.47 | 61.35  | 25.99 | 28.68 | 0.113  |
| CD8+ CD38+ HLA-DR+ | Activated CD8+T Cell (0.27-5.70%) (8.462-16.54 per ul)         | 55.97  | 19.71  | 13.75  | 130.00 | 8.81   | 4.12  | 6.86  | 0.188  |

Day 22

| Marker             | Unit                                                           | P01    | P02    | P04    | P07    | P03    | P05   | P06   | t-test |
|--------------------|----------------------------------------------------------------|--------|--------|--------|--------|--------|-------|-------|--------|
| CD4+ CD45RA+ CCR7+ | Naïve CD4+T Cell (9.56-29.87%) (154.2-239.7 per ul)            | 93.45  | 112.97 | 345.29 | 39.05  | 213.43 | 23.99 | 9.97  | 0.532  |
| CD4+ CD45RA- CCR7+ | Central Memory CD4+T Cell (7.19-26.33%) (106.2-196.9 per ul)   | 218.26 | 139.02 | 99.07  | 293.26 | 101.42 | 49.40 | 4.48  | 0.060  |
| CD4+ CD45RA+ CCR7- | Effector CD4+T Cell (0.44-6.06%) (6.432-23.10 per ul)          | 15.36  | 132.92 | 14.18  | 26.22  | 6.29   | 4.57  | 0.21  | 0.257  |
| CD4+ CD45RA- CCR7- | Effector Memory CD4+T Cell (17.27-39.12%) (149.4-242.1 per ul) | 457.14 | 374.85 | 203.38 | 166.62 | 116.72 | 69.88 | 15.17 | 0.041  |
| CD4+ CD38+ HLA-DR+ | Activated CD4+T Cell (0.58-2.43%) (8.757-14.33 per ul)         | 21.94  | 39.09  | 14.33  | 58.39  | 6.50   | 3.60  | 4.14  | 0.057  |
| CD8+ CD45RA+ CCR7+ | Naïve CD8+T Cell (1.23-8.84%) (22.80-74.10 per ul)             | 16.67  | 10.23  | 59.47  | 4.09   | 12.68  | 28.13 | 5.09  | 0.665  |
| CD8+ CD45RA- CCR7+ | Central Memory CD8+T Cell (0.37-1.63%) (7.909-12.64 per ul)    | 4.83   | 3.79   | 2.47   | 8.74   | 4.30   | 5.27  | 0.42  | 0.458  |
| CD8+ CD45RA+ CCR7- | Effector CD8+T Cell (3.26-10.42%) (28.02-52.05 per ul)         | 232.74 | 95.65  | 116.48 | 264.07 | 112.63 | 94.49 | 25.02 | 0.125  |
| CD8+ CD45RA- CCR7- | Effector Memory CD8+T Cell (8.08-27.96%) (50.34-98.14 per ul)  | 249.63 | 129.79 | 140.21 | 224.64 | 33.00  | 18.72 | 29.05 | 0.007  |
| CD8+ CD38+ HLA-DR+ | Activated CD8+T Cell (0.27-5.70%) (8.462-16.54 per ul)         | 40.36  | 24.74  | 35.59  | 150.26 | 6.08   | 7.91  | 12.30 | 0.181  |

**Supplementary Table 9. Mutation of KRAS for each patient**

| Patient ID | KRAS mutation | Chr   | Position | Ref_bp | Alt_bp | AA_Change | Mutation_type | Included in iNeo-Vac-P01 |
|------------|---------------|-------|----------|--------|--------|-----------|---------------|--------------------------|
| P01        | No            | -     | -        | -      | -      |           | -             | -                        |
| P02        | Yes           | chr12 | 25380275 | T      | A      | Q61H      | SNV           | Yes                      |
| P03        | Yes           | chr12 | 25245350 | C      | T      | G12D      | SNV           | Yes                      |
| P04        | Yes           | chr12 | 25398284 | C      | T      | G12D      | SNV           | Yes                      |
| P05        | No            | -     | -        | -      | -      |           | -             | -                        |
| P06        | Yes           | chr12 | 25398284 | C      | A      | G12V      | SNV           | Yes                      |
| P07        | Yes           | chr12 | 25245350 | C      | A      | G12V      | SNV           | Yes                      |
